# Supplementary material for: Modelling reactive case detection strategies for interrupting transmission of Plasmodium falciparum malaria
Source: Springer Nature journal article supplement (doi:10.1186/s12936-019-2893-9), 2019-07-30

**Case Management (%)**

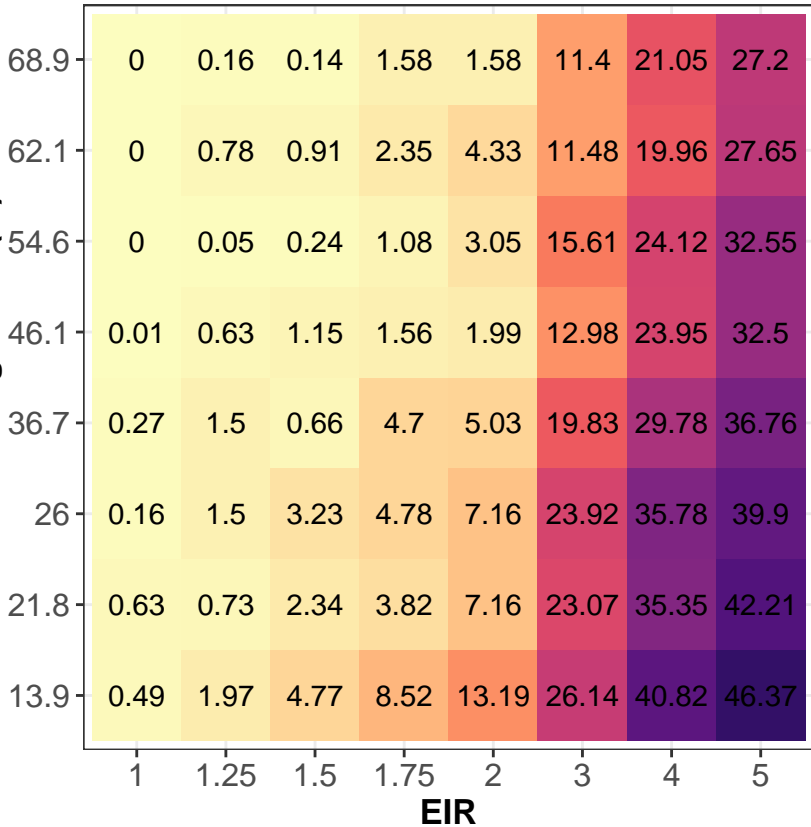

**prev (%)**

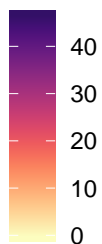

Supplement: MOESM1 [file 17023420]
